# Supplementary material for: HMGN1 Modulates Nucleosome Occupancy and DNase I Hypersensitivity at the CpG Island Promoters of Embryonic Stem Cells
Source: PubMed Central journal article supplement — Mol Cell Biol. 2013 Aug;33(16):3377–89. doi: 10.1128/MCB.00435-13 (PMC3753902; doi:10.1128/mcb.00435-13), 2013-08
Supplement: MCB.00435-13_zmb999100091so3.pdf [file MCB.00435-13_zmb999100091so3.pdf]

**Table S3.**

**Top 15 Biological process GO categories affected by loss of HMGN1 during ES cell differentiation along the neuronal pathway.**

| <b>Term (Biological Process)</b>              | <b>GO</b>  | <b>Number of genes affected</b> | <b>Adj P-value</b> |
|-----------------------------------------------|------------|---------------------------------|--------------------|
| organ morphogenesis                           | GO:0009887 | 26                              | 9.9E-06            |
| vasculature development                       | GO:0001944 | 17                              | 6.7E-06            |
| tissue development                            | GO:0009888 | 25                              | 4.2E-05            |
| development of primary sexual characteristics | GO:0045137 | 10                              | 3.4E-04            |
| lung development                              | GO:0030324 | 10                              | 5.1E-04            |
| bone development                              | GO:0060348 | 10                              | 6.8E-04            |
| regulation of cell migration                  | GO:0030334 | 9                               | 7.7E-04            |
| positive regulation of cell differentiation   | GO:0045597 | 11                              | 1.8E-03            |
| sensory organ development                     | GO:0007423 | 13                              | 2.0E-03            |
| second-messenger-mediated signaling           | GO:0019932 | 9                               | 2.9E-03            |
| odontogenesis of dentine-containing tooth     | GO:0042475 | 6                               | 4.1E-03            |
| neurogenesis                                  | GO:0022008 | 18                              | 4.9E-03            |
| morphogenesis of an epithelium                | GO:0002009 | 10                              | 5.8E-03            |
| heart morphogenesis                           | GO:0003007 | 7                               | 6.5E-03            |
| germ cell migration                           | GO:0008354 | 4                               | 7.4E-03            |
