# Supplementary figures and images for: HMGN1 Modulates Nucleosome Occupancy and DNase I Hypersensitivity at the CpG Island Promoters of Embryonic Stem Cells
Source: PubMed Central journal article supplement — Mol Cell Biol. 2013 Aug;33(16):3377–89. doi: 10.1128/MCB.00435-13 (PMC3753902; doi:10.1128/mcb.00435-13), 2013-08

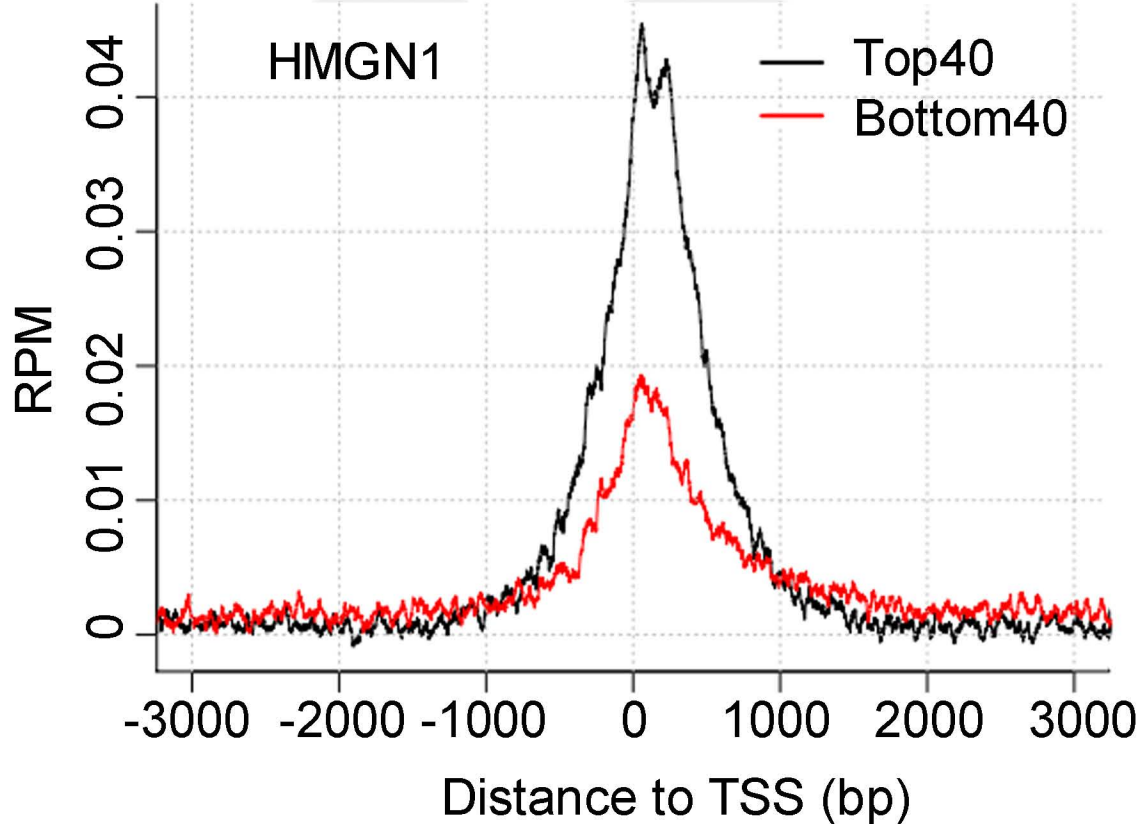

**Deng *et al* Fig. S4.** The binding of HMGN1 at the TSS of Top40 genes is stronger than to the Bot40 genes.

Supplement: MCB.00435-13_zmb999100091so8.pdf [file MCB.00435-13_zmb999100091so8.pdf]
